# Supplementary material for: Integration of phase change materials with multi-responsive halloysite nanotubes for efficient Pickering emulsification of high-viscosity oil
Source: Royal Society of Chemistry journal article supplement (doi:10.1039/d3ta06013f), 2023-11-28
Supplement: d3ta06013f1.pdf [file d3ta06013f1.pdf]

## Supporting information

### **Integration of phase change materials with multi-responsive halloysite nanotubes for efficient Pickering emulsification of high-viscosity oil**

Limei Dong <sup>a, b</sup>, Dan Zhang <sup>a, b</sup>, Junfeng Li <sup>a, b</sup>, Shichong Guo <sup>a, b</sup>, Ying Xue <sup>a, b</sup>, Zhining Wang <sup>c</sup>, and

Yiming Li <sup>a, b, \*</sup>

<sup>a</sup> Frontiers Science Center for Deep Ocean Multispheres and Earth System/Key Laboratory of Marine Chemistry Theory and Technology, Ministry of Education, Ocean University of China, 266100, Qingdao, P.R. China

<sup>b</sup> College of Chemistry and Chemical Engineering, Ocean University of China, Qingdao, 266100, P.R. China

<sup>c</sup> Shandong Key Laboratory of Water Pollution Control and Resource Reuse, School of Environmental Science and Engineering, Shandong University, Qingdao 266237, P.R. China

---

\* Corresponding author. Tel: 86 532 66782509. E-mail: [liyym@ouc.edu.cn](mailto:liyym@ouc.edu.cn) (Y. M. Li)

## Summary of Content

|                                                                                                                                                                                                                                                                                                |            |
|------------------------------------------------------------------------------------------------------------------------------------------------------------------------------------------------------------------------------------------------------------------------------------------------|------------|
| <b>Fig. S1.</b> (a) N <sub>2</sub> adsorption-desorption isotherms and (b) pore size distributions of Fe <sub>3</sub> O <sub>4</sub> /PDA/HNTs and 40% PEG@ Fe <sub>3</sub> O <sub>4</sub> /PDA/HNTs.                                                                                          | <b>S3</b>  |
| <b>Fig. S2.</b> (a) FTIR spectra and (b) XRD patterns of PEG@Fe <sub>3</sub> O <sub>4</sub> /PDA/HNTs with different PEG contents.                                                                                                                                                             | <b>S4</b>  |
| <b>Fig. S3.</b> Tangential method for determining the starting and terminating points of the phase change of 40% PEG@Fe <sub>3</sub> O <sub>4</sub> /PDA/HNTs at irradiation intensity of (a) 100 mW/cm <sup>2</sup> , (b) 150 mW/cm <sup>2</sup> and (c) 200 mW/cm <sup>2</sup> .             | <b>S5</b>  |
| <b>Fig. S4.</b> The magnetic-thermal conversion cycling property of (a) 30% PEG@Fe <sub>3</sub> O <sub>4</sub> /PDA/HNTs, (b) 35% PEG@Fe <sub>3</sub> O <sub>4</sub> /PDA/HNTs, (c) 45% PEG@Fe <sub>3</sub> O <sub>4</sub> /PDA/HNTs and (d) 50% PEG@Fe <sub>3</sub> O <sub>4</sub> /PDA/HNTs. | <b>S6</b>  |
| <b>Fig. S5.</b> The curves of temperature change with time after the pre-heated Fe <sub>3</sub> O <sub>4</sub> /PDA/HNTs and 40% PEG@Fe <sub>3</sub> O <sub>4</sub> /PDA/HNTs spread on the surface of the oil at (a)10 °C, (b) 15 °C and (c) 25 °C.                                           | <b>S7</b>  |
| <b>Fig. S6.</b> The IR photographs after the pre-heated (a, b, c) Fe <sub>3</sub> O <sub>4</sub> /PDA/HNTs and (a', b', c') 40% PEG@Fe <sub>3</sub> O <sub>4</sub> /PDA/HNTs spread on the surface of the oil at 10 °C, 15 °C and 25 °C, respectively.                                         | <b>S8</b>  |
| <b>Fig. S7.</b> Viscosity changes of high-viscosity oil droplets after in contact with (a) Fe <sub>3</sub> O <sub>4</sub> /PDA/HNTs and (b) 40% PEG@Fe <sub>3</sub> O <sub>4</sub> /PDA/HNTs under the light irradiation.                                                                      | <b>S9</b>  |
| <b>Fig. S8.</b> Viscosity changes process of high-viscosity oil droplets in contact with (a) Fe <sub>3</sub> O <sub>4</sub> /PDA/HNTs and (b) 40% PEG@Fe <sub>3</sub> O <sub>4</sub> /PDA/HNTs under an alternating magnetic field.                                                            | <b>S10</b> |
| <b>Fig. S9.</b> The comparison of viscosity-temperature curves before and after magnetization.                                                                                                                                                                                                 | <b>S11</b> |
| <b>Fig. S10.</b> Optical microscopy images of emulsions without emulsifier at the oil to water volume ratio of (a) 1:4, (b) 1:6, (c) 1:9, (d) 1:12.                                                                                                                                            | <b>S12</b> |
| <b>Table S1</b> Thermal properties of pure PEG and PEG@Fe <sub>3</sub> O <sub>4</sub> /PDA/HNTs composites.                                                                                                                                                                                    | <b>S13</b> |
| <b>Table S2</b> Thermal properties of 40% PEG@Fe <sub>3</sub> O <sub>4</sub> /PDA/HNTs composites before and after cycling.                                                                                                                                                                    | <b>S13</b> |
| <b>Table S3</b> Comparisons of thermal conductivities between this research and reported results.                                                                                                                                                                                              | <b>S13</b> |
| <b>Table S4</b> Comparisons of photothermal conversion performance between this research and reported results.                                                                                                                                                                                 | <b>S14</b> |
| <b>Table S5</b> Comparisons of magnetic-thermal conversion performance and magnetic-thermal conversion performance between this research and reported results.                                                                                                                                 | <b>S14</b> |

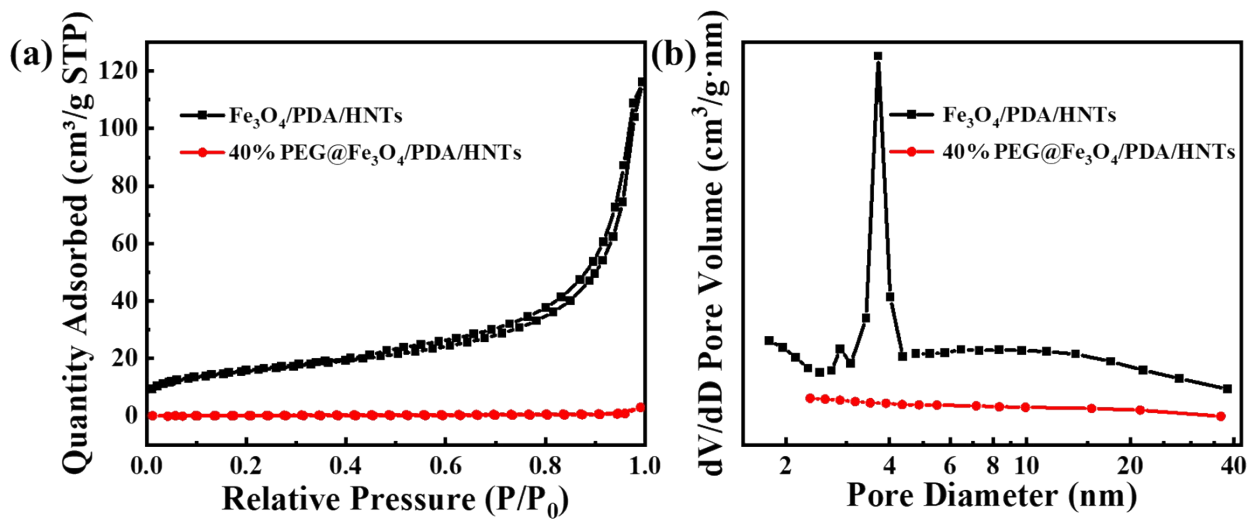

**Fig. S1.** (a)  $\text{N}_2$  adsorption-desorption isotherms and (b) pore size distributions of  $\text{Fe}_3\text{O}_4/\text{PDA}/\text{HNTs}$  and 40%  $\text{PEG}@/\text{Fe}_3\text{O}_4/\text{PDA}/\text{HNTs}$ .

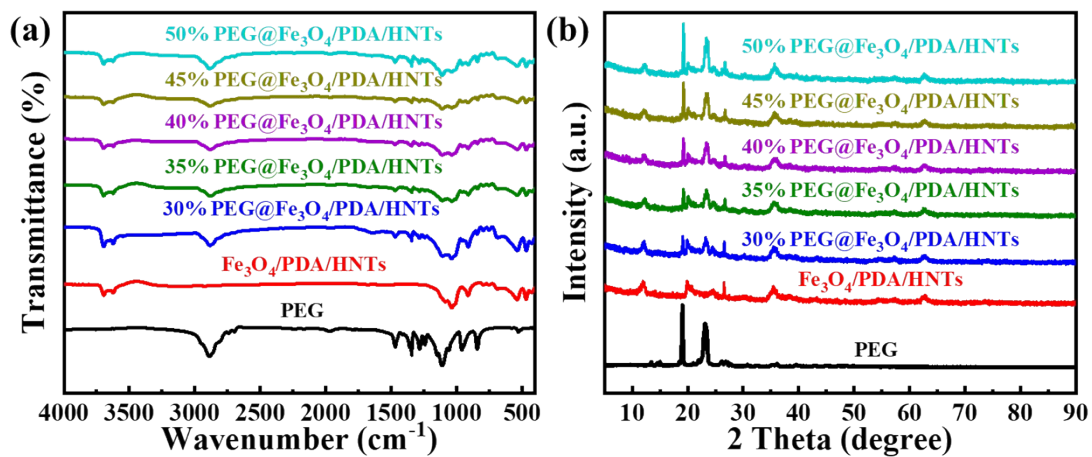

**Fig. S2.** (a) FTIR spectra and (b) XRD patterns of PEG@Fe<sub>3</sub>O<sub>4</sub>/PDA/HNTs with different PEG contents.

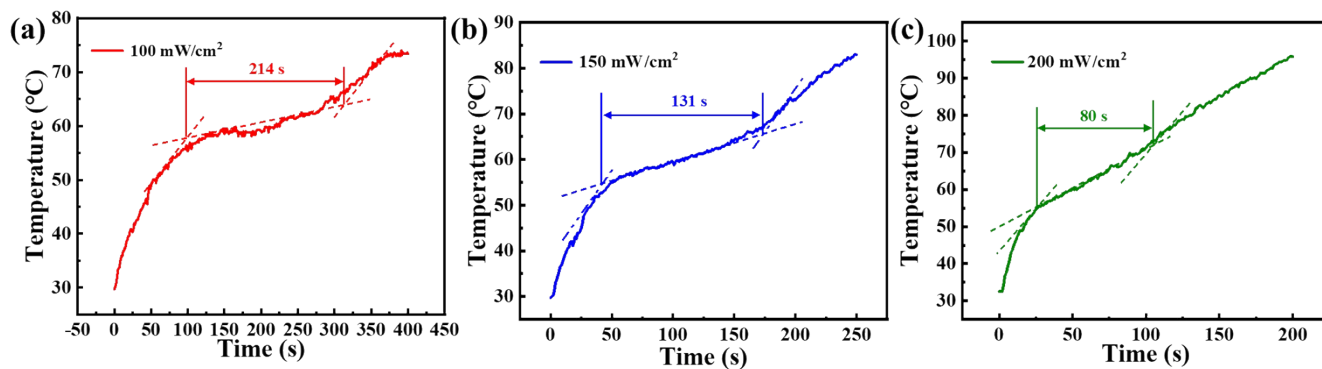

**Fig. S3.** Tangential method for determining the starting and terminating points of the phase change of 40% PEG@Fe<sub>3</sub>O<sub>4</sub>/PDA/HNTs at irradiation intensity of (a) 100 mW/cm<sup>2</sup>, (b) 150 mW/cm<sup>2</sup> and (c) 200 mW/cm<sup>2</sup>.

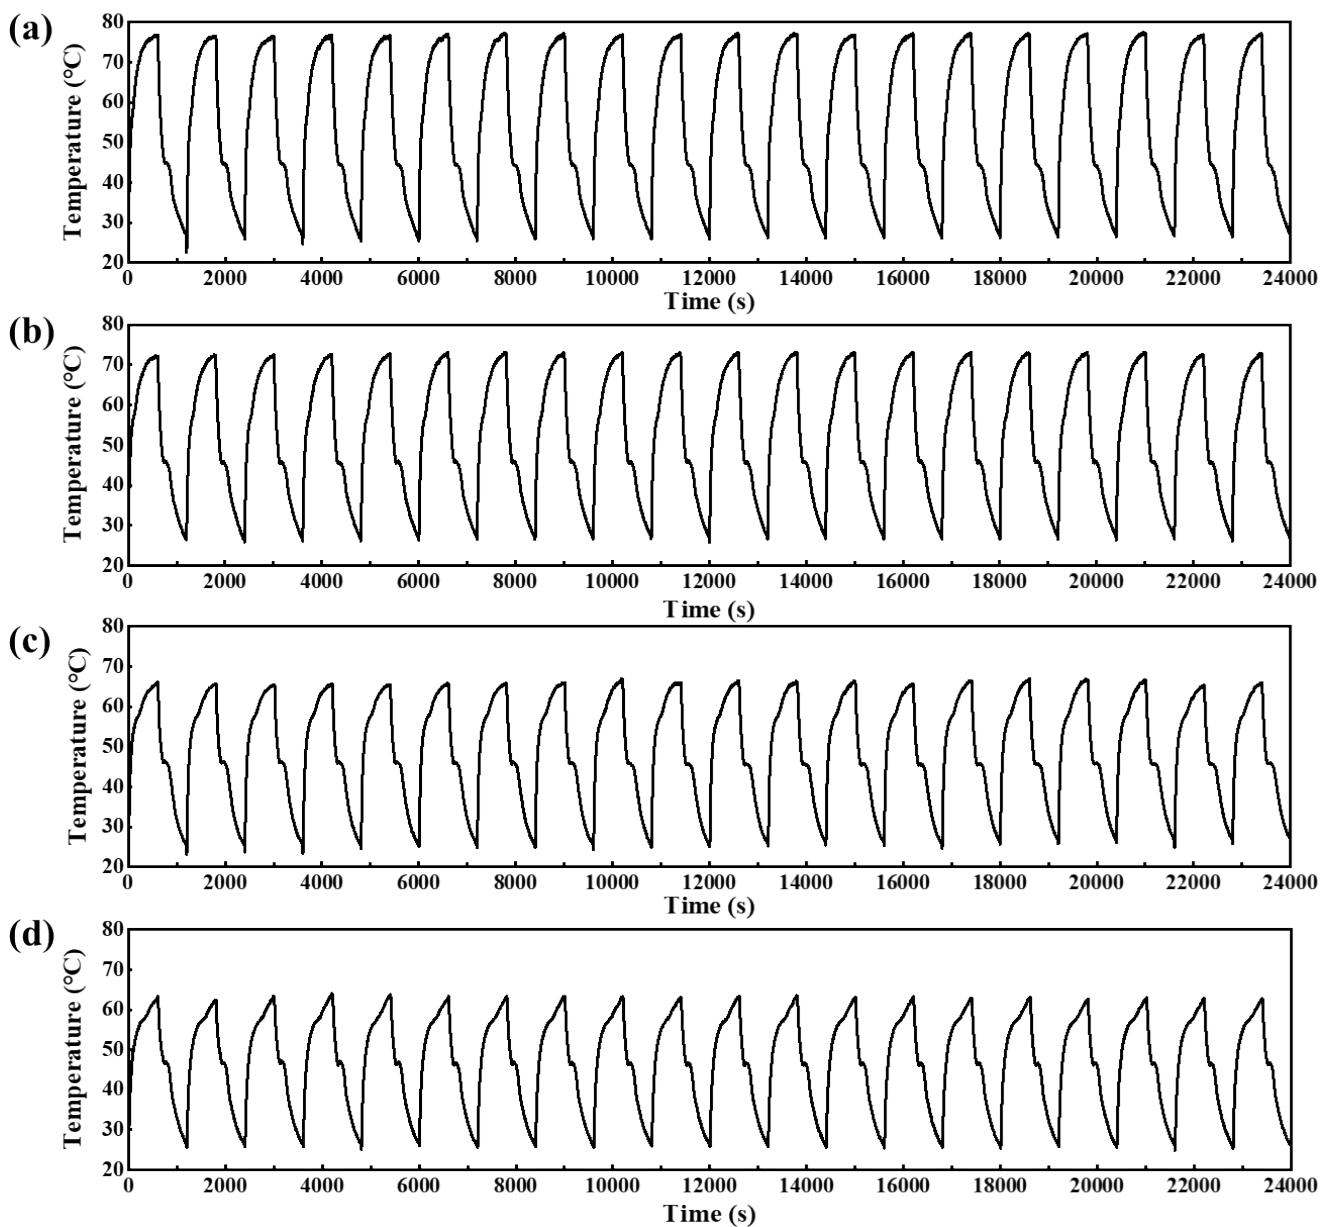

**Fig. S4.** The magnetic-thermal conversion cycling property of (a) 30% PEG@Fe<sub>3</sub>O<sub>4</sub>/PDA/HNTs, (b) 35% PEG@Fe<sub>3</sub>O<sub>4</sub>/PDA/HNTs, (c) 45% PEG@Fe<sub>3</sub>O<sub>4</sub>/PDA/HNTs and (d) 50% PEG@Fe<sub>3</sub>O<sub>4</sub>/PDA/HNTs.

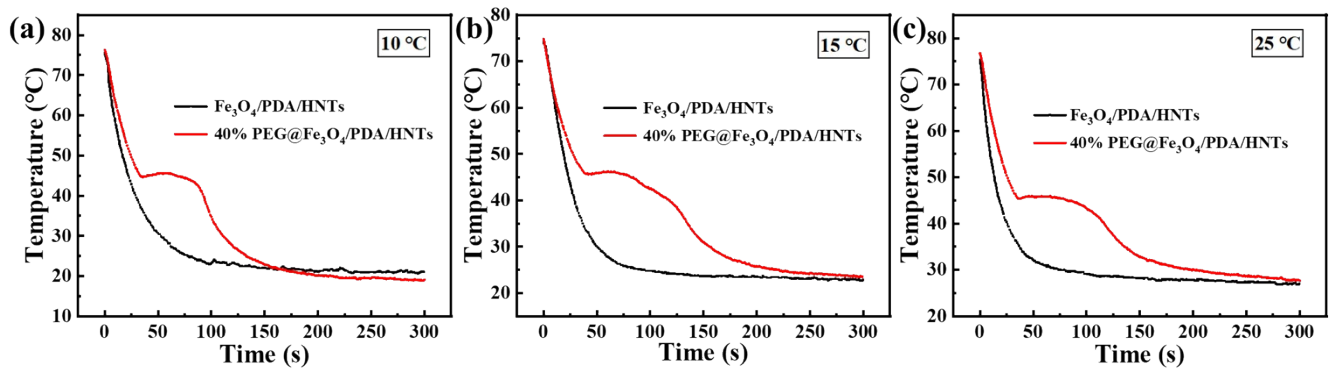

**Fig. S5.** The curves of temperature change with time after  $\text{Fe}_3\text{O}_4/\text{PDA}/\text{HNTs}$  and 40%  $\text{PEG}@Fe_3O_4/\text{PDA}/\text{HNTs}$  spread on the surface of the oil at (a) 10 °C, (b) 15 °C and (c) 25 °C.

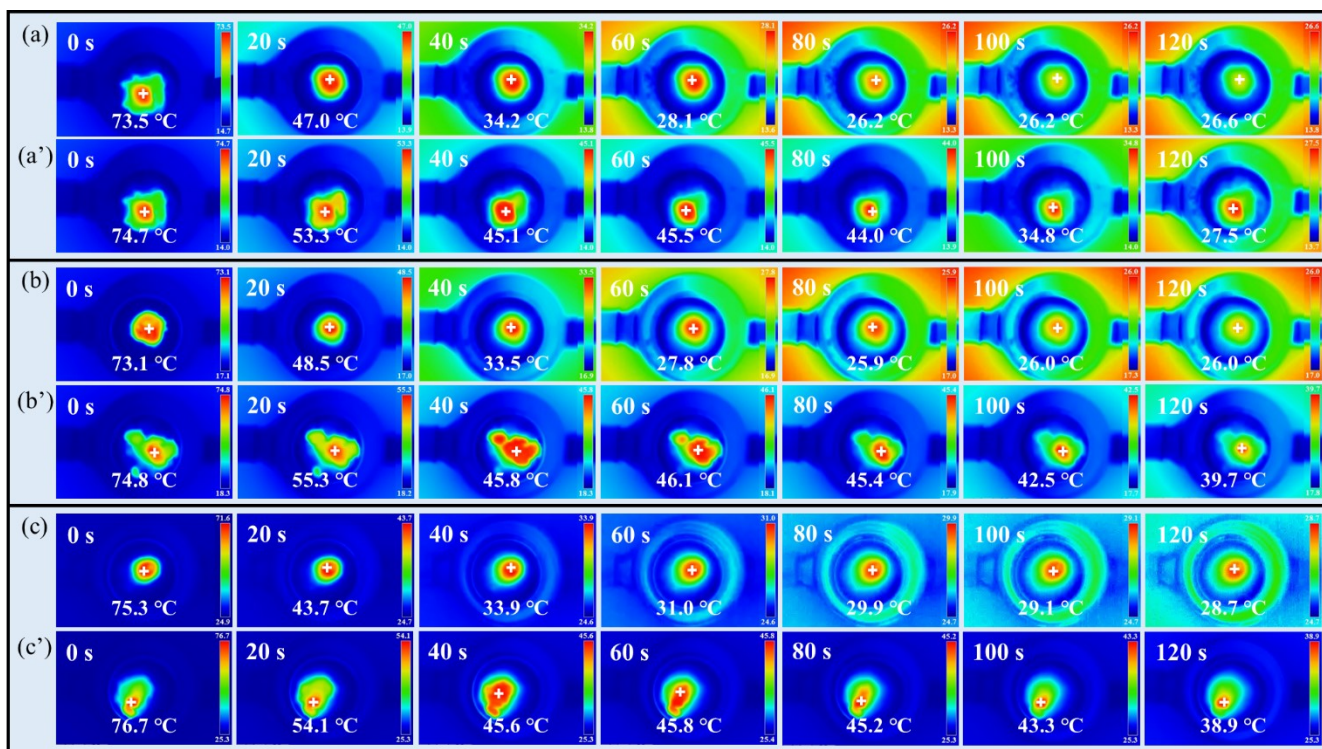

**Fig. S6.** The IR photographs after pre-heated (a, b, c)  $\text{Fe}_3\text{O}_4/\text{PDA}/\text{HNTs}$  and (a', b', c') 40%  $\text{PEG}@Fe_3\text{O}_4/\text{PDA}/\text{HNTs}$  spread on the surface of the oil at 10 °C, 15 °C and 25 °C, respectively.



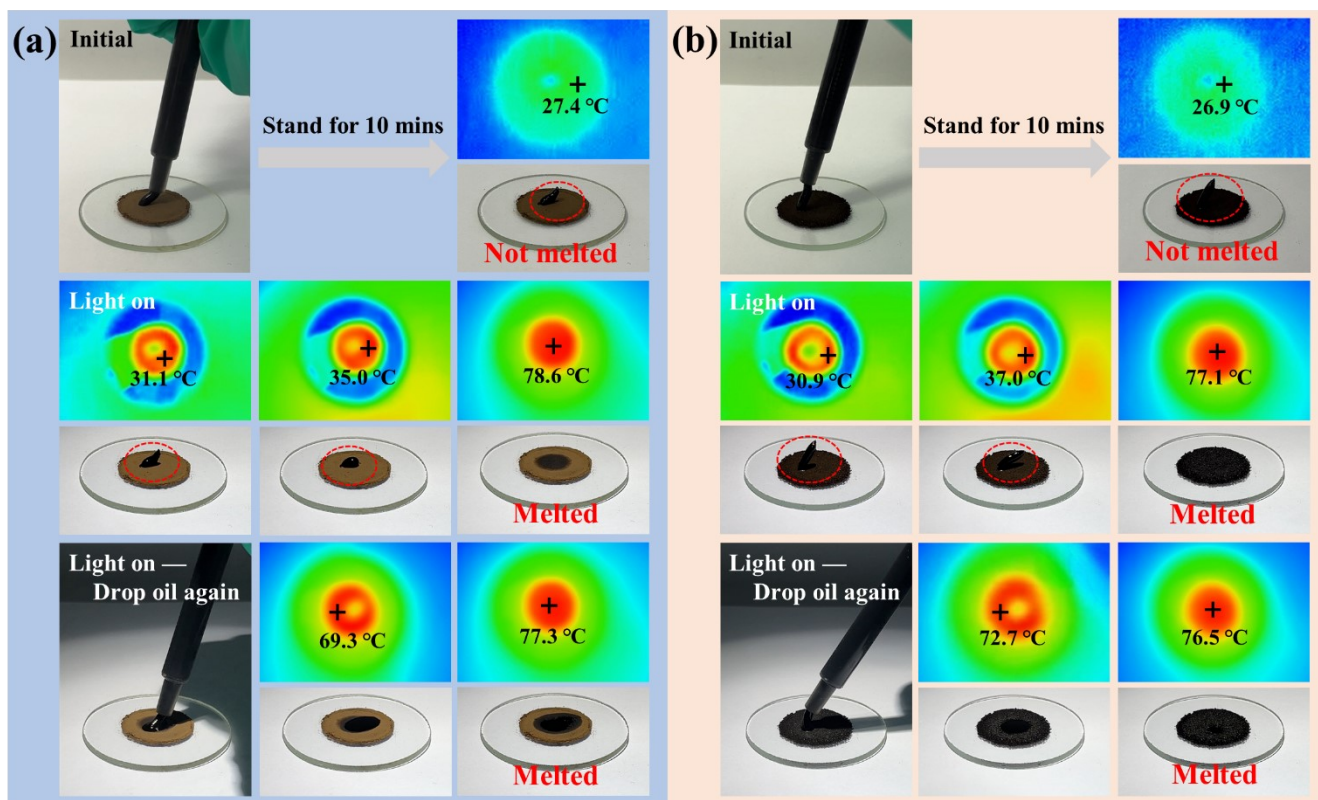

**Fig. S7.** Viscosity changes of high-viscosity oil droplets after in contact with (a)  $\text{Fe}_3\text{O}_4/\text{PDA}/\text{HNTs}$  and (b)  $40\% \text{ PEG}@\text{Fe}_3\text{O}_4/\text{PDA}/\text{HNTs}$  under the light irradiation.

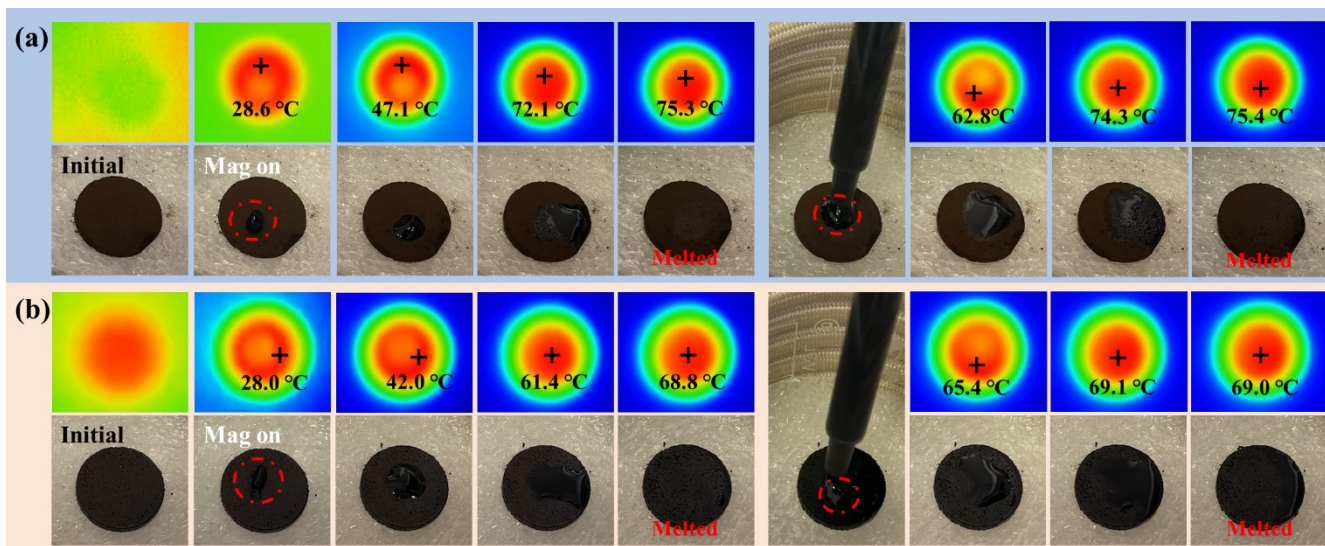

**Fig. S8.** Viscosity changes process of high-viscosity oil droplets in contact with (a)  $\text{Fe}_3\text{O}_4/\text{PDA}/\text{HNTs}$  and (b) 40%  $\text{PEG}@/\text{Fe}_3\text{O}_4/\text{PDA}/\text{HNTs}$  under an alternating magnetic field.

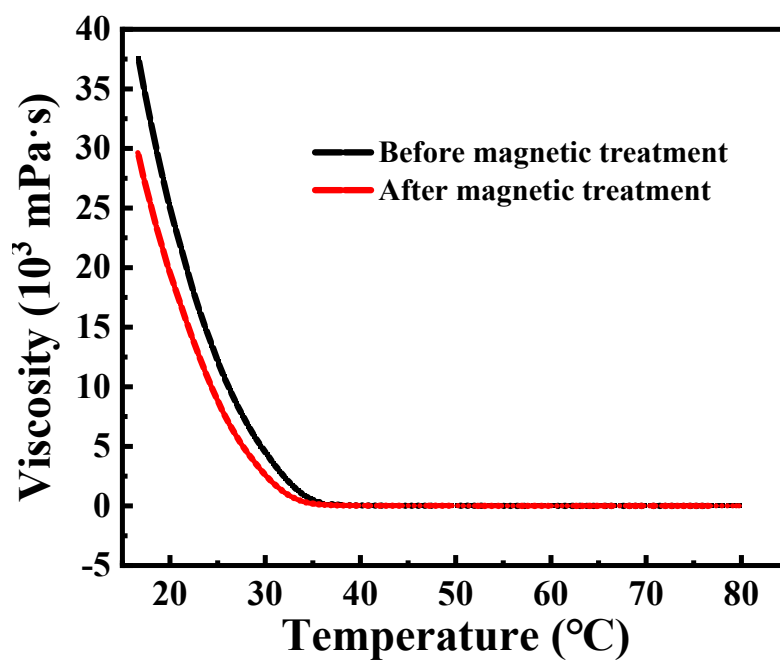

**Fig. S9.** The comparison of viscosity-temperature curves before and after magnetization.

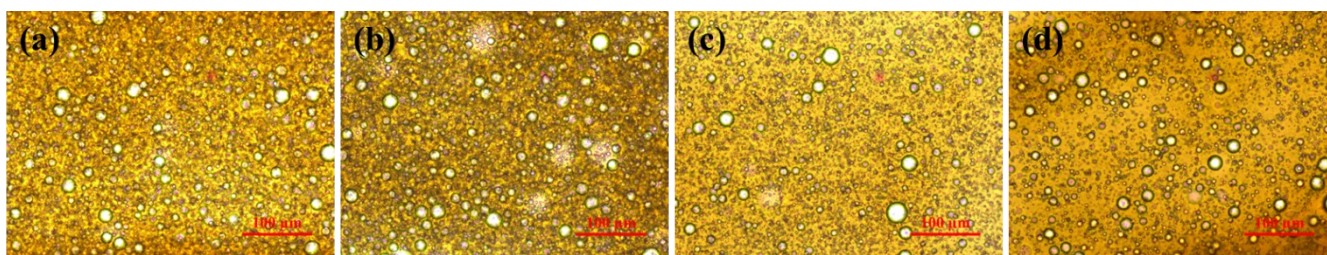

**Fig. S10.** Optical microscopy images of emulsions without emulsifier at the oil to water volume ratio of (a) 1:4, (b) 1:6, (c) 1:9, (d) 1:12.

| Samples                                         | Melting process    |            | Solidifying process |            |
|-------------------------------------------------|--------------------|------------|---------------------|------------|
|                                                 | $\Delta H_m$ (J/g) | $T_m$ (°C) | $\Delta H_c$ (J/g)  | $T_c$ (°C) |
| Pure PEG                                        | 180.61             | 59.17      | 167.21              | 48.41      |
| 30% PEG@Fe <sub>3</sub> O <sub>4</sub> /PDA/HNT | 51.28              | 55.66      | 43.08               | 41.76      |
| 35% PEG@Fe <sub>3</sub> O <sub>4</sub> /PDA/HNT | 59.34              | 54.86      | 49.13               | 42.70      |
| 40% PEG@Fe <sub>3</sub> O <sub>4</sub> /PDA/HNT | 68.24              | 55.93      | 57.84               | 41.54      |
| 45% PEG@Fe <sub>3</sub> O <sub>4</sub> /PDA/HNT | 78.18              | 56.33      | 67.14               | 43.00      |
| 50% PEG@Fe <sub>3</sub> O <sub>4</sub> /PDA/HNT | 88.57              | 57.21      | 77.77               | 44.31      |

**Table S2** Thermal properties of 40% PEG@Fe<sub>3</sub>O<sub>4</sub>/PDA/HNTs composites before and after cycling.

| Samples       | Melting process    |            | Solidifying process |            |
|---------------|--------------------|------------|---------------------|------------|
|               | $\Delta H_m$ (J/g) | $T_m$ (°C) | $\Delta H_c$ (J/g)  | $T_c$ (°C) |
| Before cycles | 68.24              | 55.93      | 57.84               | 41.54      |
| 50 cycles     | 69.89              | 56.46      | 56.72               | 41.98      |
| 100 cycles    | 70.44              | 56.36      | 59.02               | 44.30      |

**Table S3** Comparisons of thermal conductivities between this research and reported results.

| PCMs     | Support                                          | Thermal conductivity | Thermal conductivity | Refs.     |
|----------|--------------------------------------------------|----------------------|----------------------|-----------|
|          |                                                  | W/ (m·K)             | enhancement (%)      |           |
| PEG 6000 | Cu/SiO <sub>2</sub>                              | 0.41                 | 38.1                 | 1         |
| PEG 6000 | SiO <sub>2</sub> -PDA/Ag                         | 0.50                 | 70.4                 | 2         |
| PEG 6000 | SiO <sub>2</sub> -Al <sub>2</sub> O <sub>3</sub> | 0.42                 | 41.1                 | 3         |
| PEG 6000 | Fe <sub>3</sub> O <sub>4</sub> -GO               | 0.38                 | 52.0                 | 4         |
| PEG 6000 | Fe <sub>3</sub> O <sub>4</sub> /PDA/HNT<br>s     | 0.78                 | 130.0                | This work |

**Table S4** Comparisons of photothermal conversion performance between this research and reported results.

| Samples                                      | Irradiation intensity | Temperature | Photothermal conversion | Refs.     |
|----------------------------------------------|-----------------------|-------------|-------------------------|-----------|
|                                              | (mW/cm <sup>2</sup> ) | (°C)        | efficiency (%)          |           |
| Pn@ND/MF microPCMs <sup>a</sup>              | -                     | 73.0        | 64.7                    | 5         |
| ODE microcapsules <sup>b</sup>               | 500.0                 | 39.4        | 42.8                    | 6         |
| HPC-PW <sup>c</sup>                          | 200.0                 | 70.0        | 31.0                    | 7         |
| FCA <sup>d</sup>                             | 200.0                 | 47.0        | 60.6                    | 8         |
| PEG@MCHS <sup>e</sup>                        | 150.0                 | 80.9        | 58.0                    | 9         |
| PEG@Fe <sub>3</sub> O <sub>4</sub> /PDA/HNTs | 100.0                 | 80.9        | 69.2                    | This work |

<sup>a</sup> Pn@ND/MF microPCMs: paraffin@nanodiamond/melamine formaldehyde microencapsulated phase-change materials; <sup>b</sup> ODE microcapsules: n-Octadecane with titanium dioxide nanoparticle-doped styrene-divinylbenzene copolymer; <sup>c</sup> HPC: hierarchical porous carbon; <sup>d</sup> FCA: Fe-doped carbon aerogel; <sup>e</sup> MCHS: mesoporous carbon hollow spheres.

**Table S5** Comparisons of magnetic-thermal conversion performance and magnetic-thermal conversion performance between this research and reported results.

| Samples                                                  | Irradiation intensity | Temperature | Input alternating | Temperature | Refs.     |
|----------------------------------------------------------|-----------------------|-------------|-------------------|-------------|-----------|
|                                                          | (mW/cm <sup>2</sup> ) | (°C)        | current (A)       | (°C)        |           |
| LA/CKF@Fe <sub>3</sub> O <sub>4</sub> <sup>a</sup>       | 100.0                 | 60.0        | -                 | 50.0        | 10        |
| MXene@PDA@PPEE <sup>b</sup>                              | -                     | 87.0        | 12.4              | 75.0        | 11        |
| MXene@Fe <sub>3</sub> O <sub>4</sub> -MA-PU <sup>c</sup> | 150.0                 | 75.0        | 10.0              | 70.0        | 12        |
| FCA                                                      | 200.0                 | 47.0        | 12.0              | 60.0        | 8         |
| PEG@Fe <sub>3</sub> O <sub>4</sub> /PDA/HNTs             | 100.0                 | 80.9        | 8.0               | 68.5        | This work |

<sup>a</sup> LA/CKF: lauric acid/carbonized kapok fiber aerogel; <sup>b</sup> PPEE: PEG@PDA@EPDM/EG; <sup>c</sup> MA: myristic acid.

## References

- 1 B. Tang, M. Qiu and S. Zhang, *Sol. Energy Mater. Sol. Cells*, 2012, **105**, 242-248.
- 2 J. Li, X. Hu, C. Zhang, W. Luo and X. Jiang, *Renew. Energ.*, 2021, **178**, 118-127.
- 3 B. Tang, C. Wu, M. Qiu, X. Zhang and S. Zhang, *Mater. Chem. Phys.*, 2014, **144**, 162-167.
- 4 L. Liu, J. Hu, X. Fan, Y. Zhang, S. Zhang and B. Tang, *Chem. Eng. J.*, 2021, **426**, 130789.
- 5 L. Xu, Q. Zhao, Y. Li, F. He, Y. Zhou, R. He, J. Fan, K. Zhang and W. Yang, *Ind. Eng. Chem. Res.*, 2020, **59**, 21736–21744.
- 6 K. Zhao, Z. Guo, J. Wang and H. X. Xie, *Sol. Energy*, 2023, **254**, 73-87.
- 7 K. Sun, Y. Kou, Y. Zhang, T. Liu and Q. Shi, *ACS Sustainable Chem. Eng.*, 2020, **8**, 3445-3453.
- 8 K. Sun, Y. Kou, H. Dong, S. Ye, D. Zhao, J. Liu and Q. Shi, *J. Mater. Chem. A*, 2021, **9**, 1213-1220.
- 9 L. Dong, Y. Li, J. Li, Y. Guan, X. Chen, D. Zhang and Z. Wang, *J. Hazard. Mater.*, 2023, **451**, 131112.
- 10 S. Song, H. Ai, W. Zhu, L. Lv, R. Feng and L. Dong, *Composites, Part B*, 2021, **226**, 109330.
- 11 X. Hu, B. Quan, B. Ai, M. Sheng, S. Liu, X. Huang, H. Wu, L. Xiang and J. Qu, *J. Mater. Chem. A*, 2023, **11**, 16138.
- 12 Y. Gao, Z. Tang, X. Chen, J. Yan, Y. Jiang, J. Xu, Z. Tao, L. Wang, Z. Liu and G. Wang, *Aggregate*, 2022, **4**, e248.
